# Supplementary material for: Using trace elements to identify the geographic origin of migratory bats
Source: PeerJ. 2020 Oct 19;8:e10082. doi: 10.7717/peerj.10082 (PMC7580586; doi:10.7717/peerj.10082)
Supplement: Supplemental Information 5 [file peerj-08-10082-s005.xlsx]

## Sheet: Sheet1
TotalQuant - Summary Report
Sample ID:	Blank
Sample Date/Time:	Thursday, May 25, 2017 13:43:20
Sample Description:
Solution Type:	Blank
Sample File:
Method File:	C:\Users\Public\Documents\PerkinElmer Syngistix\ICPMS\Method\TotalQuant ADL.mth
Dataset File:	C:\Users\Public\Documents\PerkinElmer Syngistix\ICPMS\DataSet\17-9045 Wieringa TQ 1\Blank.001
Response File:	C:\Users\Public\Documents\PerkinElmer Syngistix\ICPMS\System\totalquant.rsp
Initial Sample Quantity (mg):
Sample Prep Volume (mL):
Aliquot Volume (mL):
Diluted to Volume (mL):
Torch Z Position (mm):	0
Report Concentration Unit:	ppb
Analyte Intensities
Analyte	Concentration	Intensity
H
He
Li	0.017	715
Be	0	2
B	9.168	122298
C	3769.11	7466189
N	1.05828e+07	142454104
O
F		83092555
Ne		832
Na	6.884	553257
Mg	0.296	19169
Al	0.079	6103
Si	83.311	3671546
P	10.866	75947
S	56013.8	354764481
Cl	608.268	289352
Ar	2.61617e+10	29086114107
K	106.011	2083347
Ca	6.357	124692
Sc	0.052	3238
Ti	0.119	5309
V	0.096	3930
Cr	0.687	30221
Mn	0.022	1084
Fe	28.859	1002479
Co	0.002	69
Ni	0.009	280
Cu	0.075	1877
Zn	0.072	1055
Ga	0.001	26
Ge	0	0
As	0.032	99
Se	3.661	20735
Br	0.386	769
Kr	0	0
Rb	0.001	95
Sr	0.002	176
Y	0	22
Zr	0.002	72
Nb	0	4
Mo	0.001	35
Ru	0	0
Rh	0	7
Pd	0	19
Ag	0	13
Cd	0	8
In	0.002	177
Sn	0.006	599
Sb	0	4
Te	0	0
I	0.339	2101
Xe	65.851	98798
Cs	0.035	3076
Ba	0.003	266
La	0	12
Ce	0	17
Pr	0	2
Nd	0	0
Sm	0	0
Eu	0	4
Gd	0	0
Tb	0	4
Dy	0	0
Ho	0	0
Er	0	0
Tm	0	0
Yb	0	0
Lu	0	2
Hf	0	0
Ta	0	7
W	0.002	93
Re	0	0
Os	0	0
Ir	0	5
Pt	0	0
Au	0.022	229
Hg	0.003	37
Tl	0.374	24796
Pb	0.013	730
Bi	0.001	66
Th	0	0
U	0.001	14
TotalQuant Equations
Analyte	Equation
Ca	740.74*mass 43
Ti	13.44*mass 47
Se	11.455*mass 82
Fe	47.17*mass 57
TotalQuant - Summary Report
Sample ID:	TotalQuant Std
Sample Date/Time:	Thursday, May 25, 2017 13:46:44
Sample Description:
Solution Type:	Standard
Sample File:
Method File:	C:\Users\Public\Documents\PerkinElmer Syngistix\ICPMS\Method\TotalQuant ADL.mth
Dataset File:	C:\Users\Public\Documents\PerkinElmer Syngistix\ICPMS\DataSet\17-9045 Wieringa TQ 1\TotalQuant Std.002
Response File:	C:\Users\Public\Documents\PerkinElmer Syngistix\ICPMS\System\totalquant.rsp
Initial Sample Quantity (mg):
Sample Prep Volume (mL):
Aliquot Volume (mL):
Diluted to Volume (mL):
Torch Z Position (mm):	0
Report Concentration Unit:	ppb
Analyte Intensities
Analyte	Concentration	Intensity
H
He
Li	0.067	2824
Be	10	121882
B	0.731	9748
C	48753.7	96575604
N	759906	10229030
O
F		3282501
Ne		1796
Na	2.179	175121
Mg	1.669	108208
Al	10	776527
Si	40.203	1771758
P	4.049	28301
S	4346	27525521
Cl	0	0
Ar	3.39546e+08	377501648
K	21.975	431863
Ca	108.454	2127398
Sc	0.015	909
Ti	2.07	92649
V	10	411507
Cr	10	439849
Mn	10	493996
Fe	3.668	127404
Co	10	379067
Ni	100	3113027
Cu	10	251589
Zn	10	146780
Ga	0.002	64
Ge	0	0
As	10	30597
Se	10	56643
Br	2.717	5406
Kr	0	0
Rb	0	1
Sr	0.017	1375
Y	0.003	242
Zr	0.041	1837
Nb	0.002	71
Mo	10	351103
Ru	0.001	40
Rh	0.001	69
Pd	0	0
Ag	10	534923
Cd	10	696403
In	0	20
Sn	0.097	9004
Sb	10	388256
Te	0	0
I	1.63	10099
Xe	0	0
Cs	0.005	426
Ba	10	967007
La	0.002	204
Ce	0.025	2389
Pr	0	9
Nd	0	29
Sm	0	31
Eu	0.001	74
Gd	0	0
Tb	0	0
Dy	0	0
Ho	0	0
Er	0	0
Tm	0	7
Yb	0	0
Lu	0.003	154
Hf	0.001	61
Ta	0	0
W	0	0
Re	0	5
Os	0	0
Ir	0	0
Pt	0	0
Au	0.011	117
Hg	0	0
Tl	10	662963
Pb	10	571438
Bi	0.021	961
Th	10	739234
U	10	204679
TotalQuant Equations
Analyte	Equation
Ca	740.74*mass 43
Ti	13.44*mass 47
Se	11.455*mass 82
Fe	47.17*mass 57
TotalQuant - Summary Report
Sample ID:	TQ chk A
Sample Date/Time:	Thursday, May 25, 2017 13:50:43
Sample Description:
Solution Type:	Sample
Sample File:
Method File:	C:\Users\Public\Documents\PerkinElmer Syngistix\ICPMS\Method\TotalQuant ADL.mth
Dataset File:	C:\Users\Public\Documents\PerkinElmer Syngistix\ICPMS\DataSet\17-9045 Wieringa TQ 1\TQ chk A.003
Response File:	C:\Users\Public\Documents\PerkinElmer Syngistix\ICPMS\System\totalquant.rsp
Initial Sample Quantity (mg):
Sample Prep Volume (mL):
Aliquot Volume (mL):
Diluted to Volume (mL):
Torch Z Position (mm):	0
Report Concentration Unit:	ppb
Analyte Intensities
Analyte	Concentration	Intensity
H
He
Li	0.068	2863
Be	10.055	122549
B	0.287	3822
C	50760.1	100550197
N	839094	11294968
O
F		5161062
Ne		1966
Na	1.495	120124
Mg	1.634	105928
Al	10.406	808062
Si	41.56	1831556
P	3.56	24880
S	4271.81	27055604
Cl	0	0
Ar	5.72125e+08	636078983
K	23.927	470214
Ca	108.328	2124928
Sc	0.016	1017
Ti	2.216	99149
V	9.753	401339
Cr	10.99	483382
Mn	9.787	483490
Fe	3.294	114410
Co	10.265	389122
Ni	98.962	3080698
Cu	9.442	237554
Zn	10.222	150034
Ga	0.003	114
Ge	0	0
As	9.935	30398
Se	9.697	54924
Br	2.67	5314
Kr	0	0
Rb	0.001	86
Sr	0.015	1212
Y	0.003	247
Zr	0.048	2151
Nb	0.002	67
Mo	9.857	346096
Ru	0	10
Rh	0.001	52
Pd	0	0
Ag	10.157	543348
Cd	10.006	696844
In	0.001	55
Sn	0.072	6729
Sb	9.979	387454
Te	0	0
I	1.683	10428
Xe	1.418	2128
Cs	0.008	722
Ba	9.905	957853
La	0.002	182
Ce	0.025	2393
Pr	0	14
Nd	0	7
Sm	0.001	109
Eu	0	42
Gd	0	0
Tb	0	6
Dy	0	0
Ho	0	4
Er	0	0
Tm	0	2
Yb	0	21
Lu	0.003	177
Hf	0.002	82
Ta	0	9
W	0	0
Re	0	0
Os	0	0
Ir	0	0
Pt	0	0
Au	0.005	52
Hg	0	0
Tl	9.96	660300
Pb	10.179	581666
Bi	0.02	931
Th	9.885	730765
U	8.571	175439
TotalQuant Equations
Analyte	Equation
Ca	740.74*mass 43
Ti	13.44*mass 47
Se	11.455*mass 82
Fe	47.17*mass 57
TotalQuant - Summary Report
Sample ID:	Blank chk A
Sample Date/Time:	Thursday, May 25, 2017 13:55:28
Sample Description:
Solution Type:	Sample
Sample File:
Method File:	C:\Users\Public\Documents\PerkinElmer Syngistix\ICPMS\Method\TotalQuant ADL.mth
Dataset File:	C:\Users\Public\Documents\PerkinElmer Syngistix\ICPMS\DataSet\17-9045 Wieringa TQ 1\Blank chk A.004
Response File:	C:\Users\Public\Documents\PerkinElmer Syngistix\ICPMS\System\totalquant.rsp
Initial Sample Quantity (mg):
Sample Prep Volume (mL):
Aliquot Volume (mL):
Diluted to Volume (mL):
Torch Z Position (mm):	0
Report Concentration Unit:	ppb
Analyte Intensities
Analyte	Concentration	Intensity
H
He
Li	0	0
Be	0.002	24
B	0	0
C	1244.62	2465462
N	334872	4507681
O
F		5773023
Ne		0
Na	0	0
Mg	0	0
Al	0	0
Si	1.49	65656
P	0.853	5960
S	3648.97	23110839
Cl	0	0
Ar	1.03979e+09	1156024054
K	19.126	375859
Ca	0.126	2470
Sc	0	0
Ti	0	0
V	0	0
Cr	0	0
Mn	0	0
Fe	2.772	96299
Co	0.002	61
Ni	0.007	221
Cu	0	0
Zn	0	0
Ga	0	0
Ge	0	0
As	0.003	9
Se	0	0
Br	0.152	304
Kr	0	0
Rb	0	0
Sr	0	0
Y	0	0
Zr	0	0
Nb	0	2
Mo	0.002	63
Ru	0	0
Rh	0	6
Pd	0	0
Ag	0.003	145
Cd	0.001	95
In	0.001	60
Sn	0	6
Sb	0.001	36
Te	0	0
I	0.101	626
Xe	1.796	2696
Cs	0.001	117
Ba	0	0
La	0	4
Ce	0	12
Pr	0	2
Nd	0	0
Sm	0	0
Eu	0	0
Gd	0	0
Tb	0	4
Dy	0	0
Ho	0	0
Er	0	0
Tm	0	0
Yb	0	0
Lu	0	2
Hf	0	0
Ta	0	2
W	0	0
Re	0	0
Os	0	0
Ir	0	0
Pt	0	0
Au	0.001	12
Hg	0	0
Tl	0	0
Pb	0	0
Bi	0	6
Th	0.023	1727
U	0.008	169
TotalQuant Equations
Analyte	Equation
Ca	740.74*mass 43
Ti	13.44*mass 47
Se	11.455*mass 82
Fe	47.17*mass 57
TotalQuant - Summary Report
Sample ID:	Meth Blk 1
Sample Date/Time:	Thursday, May 25, 2017 13:59:02
Sample Description:
Solution Type:	Sample
Sample File:
Method File:	C:\Users\Public\Documents\PerkinElmer Syngistix\ICPMS\Method\TotalQuant ADL.mth
Dataset File:	C:\Users\Public\Documents\PerkinElmer Syngistix\ICPMS\DataSet\17-9045 Wieringa TQ 1\Meth Blk 1.005
Response File:	C:\Users\Public\Documents\PerkinElmer Syngistix\ICPMS\System\totalquant.rsp
Initial Sample Quantity (mg):
Sample Prep Volume (mL):
Aliquot Volume (mL):
Diluted to Volume (mL):
Torch Z Position (mm):	0
Report Concentration Unit:	ppb
Analyte Intensities
Analyte	Concentration	Intensity
H
He
Li	0.009	377
Be	0	6
B	5.198	69345
C	22787.7	45139867
N	8.74311e+06	117690203
O
F		9302247
Ne		16744
Na	28.298	2274287
Mg	10.455	677911
Al	2.244	174246
Si	28.328	1248441
P	14.613	102139
S	14601.6	92479462
Cl	909.363	432583
Ar	0	0
K	43.957	863841
Ca	1099.77	21572817
Sc	0.003	164
Ti	0.309	13845
V	0.01	413
Cr	0.597	26271
Mn	0.062	3071
Fe	8.245	286416
Co	0.073	2756
Ni	0.103	3200
Cu	0.035	893
Zn	15.2	223108
Ga	0	5
Ge	0	0
As	0.018	56
Se	0.253	1433
Br	0.336	670
Kr	0	0
Rb	0.001	102
Sr	0.179	14327
Y	0.001	81
Zr	0.021	950
Nb	0	7
Mo	0.006	199
Ru	0	0
Rh	0	0
Pd	0	0
Ag	0.003	161
Cd	0.001	40
In	12.772	1208194
Sn	0.032	2976
Sb	0.004	137
Te	0	0
I	0.138	856
Xe	1.778	2669
Cs	0.008	689
Ba	0.024	2300
La	0.002	152
Ce	0.002	183
Pr	0	16
Nd	0.001	67
Sm	0	0
Eu	0	0
Gd	0	0
Tb	0.001	47
Dy	0	18
Ho	0	2
Er	0	0
Tm	0	0
Yb	0	0
Lu	0.005	295
Hf	0	7
Ta	0	6
W	0.02	833
Re	0	0
Os	0	0
Ir	0	0
Pt	0	0
Au	0.012	124
Hg	0.016	179
Tl	0	0
Pb	0.017	996
Bi	0.006	264
Th	0.036	2661
U	0.006	131
TotalQuant Equations
Analyte	Equation
Ca	740.74*mass 43
Ti	13.44*mass 47
Se	11.455*mass 82
Fe	47.17*mass 57
TotalQuant - Summary Report
Sample ID:	Meth Blk 2
Sample Date/Time:	Thursday, May 25, 2017 14:03:35
Sample Description:
Solution Type:	Sample
Sample File:
Method File:	C:\Users\Public\Documents\PerkinElmer Syngistix\ICPMS\Method\TotalQuant ADL.mth
Dataset File:	C:\Users\Public\Documents\PerkinElmer Syngistix\ICPMS\DataSet\17-9045 Wieringa TQ 1\Meth Blk 2.006
Response File:	C:\Users\Public\Documents\PerkinElmer Syngistix\ICPMS\System\totalquant.rsp
Initial Sample Quantity (mg):
Sample Prep Volume (mL):
Aliquot Volume (mL):
Diluted to Volume (mL):
Torch Z Position (mm):	0
Report Concentration Unit:	ppb
Analyte Intensities
Analyte	Concentration	Intensity
H
He
Li	0	0
Be	0	0
B	0	0
C	2709.65	5367513
N	1.09895e+07	147928941
O
F		0
Ne		0
Na	0	0
Mg	0	0
Al	0	0
Si	48.969	2158079
P	0	0
S	0	0
Cl	0	0
Ar	4.95788e+09	5512089480
K	0	0
Ca	0	0
Sc	0	0
Ti	0	0
V	0	0
Cr	0	0
Mn	0	0
Fe	0	0
Co	0	0
Ni	0	0
Cu	0	0
Zn	0	0
Ga	0	0
Ge	0	0
As	0.036	111
Se	0.169	955
Br	0	0
Kr	0	0
Rb	0	0
Sr	0	0
Y	0	0
Zr	0	0
Nb	0	0
Mo	0	0
Ru	0	0
Rh	0	0
Pd	0	0
Ag	0	0
Cd	0	0
In	0	0
Sn	0	0
Sb	0	0
Te	0	0
I	0	0
Xe	9.55	14329
Cs	0	0
Ba	0	0
La	0	0
Ce	0	0
Pr	0	0
Nd	0	0
Sm	0	0
Eu	0	0
Gd	0	0
Tb	0	0
Dy	0	0
Ho	0	4
Er	0	0
Tm	0	0
Yb	0	0
Lu	0	0
Hf	0	0
Ta	0	0
W	0	0
Re	0	0
Os	0	0
Ir	0	0
Pt	0	0
Au	0	0
Hg	0	0
Tl	0	0
Pb	0	0
Bi	0	0
Th	0	2
U	0	0
TotalQuant Equations
Analyte	Equation
Ca	740.74*mass 43
Ti	13.44*mass 47
Se	11.455*mass 82
Fe	47.17*mass 57
TotalQuant - Summary Report
Sample ID:	Meth Blk 2
Sample Date/Time:	Thursday, May 25, 2017 14:07:25
Sample Description:
Solution Type:	Sample
Sample File:
Method File:	C:\Users\Public\Documents\PerkinElmer Syngistix\ICPMS\Method\TotalQuant ADL.mth
Dataset File:	C:\Users\Public\Documents\PerkinElmer Syngistix\ICPMS\DataSet\17-9045 Wieringa TQ 1\Meth Blk 2.007
Response File:	C:\Users\Public\Documents\PerkinElmer Syngistix\ICPMS\System\totalquant.rsp
Initial Sample Quantity (mg):
Sample Prep Volume (mL):
Aliquot Volume (mL):
Diluted to Volume (mL):
Torch Z Position (mm):	0
Report Concentration Unit:	ppb
Analyte Intensities
Analyte	Concentration	Intensity
H
He
Li	0.01	406
Be	0.001	7
B	12.414	165603
C	67315.6	133344705
N	4.38151e+07	589791030
O
F		10815318
Ne		1569
Na	235.319	18912297
Mg	11.168	724113
Al	6.528	506903
Si	175.137	7718371
P	111.271	777745
S	45995.8	291315406
Cl	3730.26	1774479
Ar	0	0
K	608.845	11965113
Ca	213.781	4193469
Sc	0.028	1739
Ti	0.815	36472
V	0.058	2380
Cr	2.29	100737
Mn	0.171	8442
Fe	22.084	767145
Co	0.007	284
Ni	1.699	52890
Cu	0.718	18068
Zn	42.564	624760
Ga	0.002	68
Ge	0	0
As	0.056	172
Se	1.109	6283
Br	1.439	2863
Kr	0	0
Rb	0.015	1190
Sr	0.156	12434
Y	0.002	166
Zr	0.199	9003
Nb	0	12
Mo	0.029	1010
Ru	0	0
Rh	0	11
Pd	0.001	53
Ag	0.006	338
Cd	0.001	87
In	13.501	1277174
Sn	0.039	3649
Sb	0.016	613
Te	0	0
I	0.213	1319
Xe	1.042	1563
Cs	0.007	659
Ba	0.114	11046
La	0.002	222
Ce	0.001	136
Pr	0	22
Nd	0	10
Sm	0	0
Eu	0	0
Gd	0	0
Tb	0.003	229
Dy	0	7
Ho	0	2
Er	0	0
Tm	0	6
Yb	0	0
Lu	0.002	95
Hf	0.006	298
Ta	0	17
W	0.11	4593
Re	0	3
Os	0	0
Ir	0	0
Pt	0	0
Au	0.046	483
Hg	0.045	521
Tl	0	0
Pb	0.035	2011
Bi	0.008	379
Th	0.012	914
U	0.001	22
TotalQuant Equations
Analyte	Equation
Ca	740.74*mass 43
Ti	13.44*mass 47
Se	11.455*mass 82
Fe	47.17*mass 57
TotalQuant - Summary Report
Sample ID:	Meth Blk 3
Sample Date/Time:	Thursday, May 25, 2017 14:10:58
Sample Description:
Solution Type:	Sample
Sample File:
Method File:	C:\Users\Public\Documents\PerkinElmer Syngistix\ICPMS\Method\TotalQuant ADL.mth
Dataset File:	C:\Users\Public\Documents\PerkinElmer Syngistix\ICPMS\DataSet\17-9045 Wieringa TQ 1\Meth Blk 3.008
Response File:	C:\Users\Public\Documents\PerkinElmer Syngistix\ICPMS\System\totalquant.rsp
Initial Sample Quantity (mg):
Sample Prep Volume (mL):
Aliquot Volume (mL):
Diluted to Volume (mL):
Torch Z Position (mm):	0
Report Concentration Unit:	ppb
Analyte Intensities
Analyte	Concentration	Intensity
H
He
Li	0.013	557
Be	0	0
B	5.055	67431
C	32698	64771073
N	1.0792e+07	145270585
O
F		9391920
Ne		13399
Na	42.385	3406429
Mg	12.701	823533
Al	3.771	292823
Si	40.248	1773745
P	17.724	123882
S	19482.6	123393607
Cl	1434.35	682317
Ar	0	0
K	81.185	1595467
Ca	911.551	17880719
Sc	0	0
Ti	0.325	14539
V	0.02	838
Cr	0.824	36246
Mn	0.094	4628
Fe	9.005	312803
Co	0.008	317
Ni	0.395	12301
Cu	0.085	2136
Zn	22.395	328720
Ga	0.001	22
Ge	0	0
As	0.068	209
Se	0.28	1585
Br	0.287	571
Kr	0	0
Rb	0.006	481
Sr	0.131	10455
Y	0.003	241
Zr	0.012	564
Nb	0	0
Mo	0.006	222
Ru	0	0
Rh	0	6
Pd	0.002	92
Ag	0.002	110
Cd	0	31
In	14.69	1389634
Sn	0.037	3441
Sb	0.004	158
Te	0.011	260
I	0.047	289
Xe	1.416	2125
Cs	0.016	1369
Ba	0.029	2770
La	0.003	261
Ce	0.003	262
Pr	0	24
Nd	0.001	83
Sm	0	0
Eu	0	4
Gd	0.002	148
Tb	0.001	51
Dy	0	0
Ho	0	4
Er	0	0
Tm	0	6
Yb	0	8
Lu	0.007	380
Hf	0	0
Ta	0	0
W	0.007	290
Re	0	5
Os	0	0
Ir	0	0
Pt	0	0
Au	0.017	176
Hg	0.013	152
Tl	0	0
Pb	0.028	1610
Bi	0.003	132
Th	0.001	67
U	0.001	19
TotalQuant Equations
Analyte	Equation
Ca	740.74*mass 43
Ti	13.44*mass 47
Se	11.455*mass 82
Fe	47.17*mass 57
TotalQuant - Summary Report
Sample ID:	Meth Blk 4
Sample Date/Time:	Thursday, May 25, 2017 14:14:50
Sample Description:
Solution Type:	Sample
Sample File:
Method File:	C:\Users\Public\Documents\PerkinElmer Syngistix\ICPMS\Method\TotalQuant ADL.mth
Dataset File:	C:\Users\Public\Documents\PerkinElmer Syngistix\ICPMS\DataSet\17-9045 Wieringa TQ 1\Meth Blk 4.009
Response File:	C:\Users\Public\Documents\PerkinElmer Syngistix\ICPMS\System\totalquant.rsp
Initial Sample Quantity (mg):
Sample Prep Volume (mL):
Aliquot Volume (mL):
Diluted to Volume (mL):
Torch Z Position (mm):	0
Report Concentration Unit:	ppb
Analyte Intensities
Analyte	Concentration	Intensity
H
He
Li	0.033	1376
Be	0.001	14
B	3.379	45071
C	26877.1	53240562
N	1.01274e+07	136324288
O
F		11315658
Ne		2230
Na	29.277	2352933
Mg	9.819	636641
Al	3.619	281000
Si	34.932	1539451
P	20.3	141889
S	23782.2	150625048
Cl	1406.71	669168
Ar	0	0
K	66.304	1303019
Ca	126.773	2486739
Sc	0	0
Ti	0.272	12187
V	0.023	955
Cr	0.82	36074
Mn	0.084	4160
Fe	11.808	410170
Co	0.023	877
Ni	0.266	8269
Cu	0.642	16160
Zn	15.53	227951
Ga	0.001	43
Ge	0	0
As	0.061	187
Se	0.142	802
Br	0.235	469
Kr	0	0
Rb	0.002	116
Sr	0.11	8770
Y	0.001	56
Zr	0.416	18827
Nb	0	4
Mo	0.011	377
Ru	0	0
Rh	0	2
Pd	0	0
Ag	0.001	77
Cd	0.002	170
In	13.468	1274011
Sn	0.014	1330
Sb	0.01	396
Te	0	0
I	0.03	186
Xe	2.737	4107
Cs	0.007	611
Ba	0.053	5094
La	0.001	66
Ce	0.001	91
Pr	0	24
Nd	0.001	57
Sm	0	0
Eu	0	4
Gd	0	0
Tb	0.001	42
Dy	0	0
Ho	0	4
Er	0	0
Tm	0	0
Yb	0	0
Lu	0.005	314
Hf	0.017	904
Ta	0	0
W	0.014	595
Re	0	3
Os	0	0
Ir	0	0
Pt	0	0
Au	0.01	104
Hg	0.028	327
Tl	0	0
Pb	0.044	2515
Bi	0.011	492
Th	0.001	94
U	0.001	19
TotalQuant Equations
Analyte	Equation
Ca	740.74*mass 43
Ti	13.44*mass 47
Se	11.455*mass 82
Fe	47.17*mass 57
TotalQuant - Summary Report
Sample ID:	Meth Blk 5
Sample Date/Time:	Thursday, May 25, 2017 14:18:17
Sample Description:
Solution Type:	Sample
Sample File:
Method File:	C:\Users\Public\Documents\PerkinElmer Syngistix\ICPMS\Method\TotalQuant ADL.mth
Dataset File:	C:\Users\Public\Documents\PerkinElmer Syngistix\ICPMS\DataSet\17-9045 Wieringa TQ 1\Meth Blk 5.010
Response File:	C:\Users\Public\Documents\PerkinElmer Syngistix\ICPMS\System\totalquant.rsp
Initial Sample Quantity (mg):
Sample Prep Volume (mL):
Aliquot Volume (mL):
Diluted to Volume (mL):
Torch Z Position (mm):	0
Report Concentration Unit:	ppb
Analyte Intensities
Analyte	Concentration	Intensity
H
He
Li	0.018	776
Be	0.001	7
B	3.597	47984
C	38227.7	75724913
N	1.06742e+07	143684512
O
F		15599317
Ne		2268
Na	136.227	10948404
Mg	10.601	687378
Al	3.444	267416
Si	47.069	2074371
P	22.39	156502
S	29027.9	183848852
Cl	1494	710692
Ar	0	0
K	343.417	6748891
Ca	144.778	2839918
Sc	0.002	129
Ti	0.302	13531
V	0.026	1060
Cr	1.118	49173
Mn	0.07	3438
Fe	13.976	485490
Co	0.012	474
Ni	0.182	5663
Cu	0	0
Zn	40.665	596881
Ga	0	0
Ge	0	0
As	0.074	227
Se	0.327	1853
Br	0.351	700
Kr	0	0
Rb	0.012	924
Sr	0.573	45786
Y	0.002	156
Zr	0.018	832
Nb	0	6
Mo	0.007	233
Ru	0	0
Rh	0	0
Pd	0.008	405
Ag	0.002	132
Cd	0.002	110
In	14.422	1364256
Sn	0.007	673
Sb	0.004	175
Te	0	0
I	0.007	42
Xe	1.108	1663
Cs	0.035	3088
Ba	0.042	4061
La	0.001	131
Ce	0.001	105
Pr	0	27
Nd	0.001	81
Sm	0	0
Eu	0	7
Gd	0.005	458
Tb	0.001	102
Dy	0	0
Ho	0	6
Er	0	0
Tm	0	4
Yb	0	0
Lu	0.006	363
Hf	0	25
Ta	0	0
W	0.012	512
Re	0	5
Os	0	0
Ir	0	0
Pt	0	0
Au	0.019	204
Hg	0.005	64
Tl	0	0
Pb	0.011	627
Bi	0.045	2086
Th	0.001	51
U	0	4
TotalQuant Equations
Analyte	Equation
Ca	740.74*mass 43
Ti	13.44*mass 47
Se	11.455*mass 82
Fe	47.17*mass 57
TotalQuant - Summary Report
Sample ID:	TQ check B
Sample Date/Time:	Thursday, May 25, 2017 14:22:21
Sample Description:
Solution Type:	Sample
Sample File:
Method File:	C:\Users\Public\Documents\PerkinElmer Syngistix\ICPMS\Method\TotalQuant ADL.mth
Dataset File:	C:\Users\Public\Documents\PerkinElmer Syngistix\ICPMS\DataSet\17-9045 Wieringa TQ 1\TQ check B.011
Response File:	C:\Users\Public\Documents\PerkinElmer Syngistix\ICPMS\System\totalquant.rsp
Initial Sample Quantity (mg):
Sample Prep Volume (mL):
Aliquot Volume (mL):
Diluted to Volume (mL):
Torch Z Position (mm):	0
Report Concentration Unit:	ppb
Analyte Intensities
Analyte	Concentration	Intensity
H
He
Li	0.068	2854
Be	10.758	131123
B	0	0
C	54951.2	108852130
N	878853	11830161
O
F		9403110
Ne		2514
Na	0	0
Mg	1.707	110705
Al	11.647	904431
Si	50.461	2223821
P	5.184	36236
S	13246.4	83896371
Cl	192.917	91771
Ar	6.87079e+08	763883864
K	26.982	530255
Ca	116.386	2282987
Sc	0.002	137
Ti	2.272	101681
V	10.978	451769
Cr	11.296	496873
Mn	10.914	539158
Fe	4.452	154651
Co	11.106	421004
Ni	108.892	3389846
Cu	10.572	265977
Zn	10.817	158768
Ga	0.002	55
Ge	0	0
As	10.931	33447
Se	11.072	62717
Br	2.806	5584
Kr	0	0
Rb	0.001	64
Sr	0.018	1444
Y	0.004	312
Zr	0.04	1821
Nb	0.002	89
Mo	10.851	380997
Ru	0	0
Rh	0.001	57
Pd	0	0
Ag	10.945	585482
Cd	10.796	751844
In	0.004	399
Sn	0.08	7444
Sb	10.775	418353
Te	0	0
I	1.698	10524
Xe	0	0
Cs	0.002	181
Ba	10.588	1023865
La	0.002	196
Ce	0.027	2530
Pr	0	19
Nd	0.001	86
Sm	0.001	61
Eu	0.001	81
Gd	0	0
Tb	0	4
Dy	0	0
Ho	0	4
Er	0	0
Tm	0	2
Yb	0	0
Lu	0.004	220
Hf	0.002	118
Ta	0	2
W	0	0
Re	0	5
Os	0	0
Ir	0	0
Pt	0	0
Au	0.006	64
Hg	0	0
Tl	10.525	697768
Pb	11.148	637028
Bi	0.023	1081
Th	10.568	781200
U	12.857	263159
TotalQuant Equations
Analyte	Equation
Ca	740.74*mass 43
Ti	13.44*mass 47
Se	11.455*mass 82
Fe	47.17*mass 57
TotalQuant - Summary Report
Sample ID:	Blank B
Sample Date/Time:	Thursday, May 25, 2017 14:26:34
Sample Description:
Solution Type:	Sample
Sample File:
Method File:	C:\Users\Public\Documents\PerkinElmer Syngistix\ICPMS\Method\TotalQuant ADL.mth
Dataset File:	C:\Users\Public\Documents\PerkinElmer Syngistix\ICPMS\DataSet\17-9045 Wieringa TQ 1\Blank B.012
Response File:	C:\Users\Public\Documents\PerkinElmer Syngistix\ICPMS\System\totalquant.rsp
Initial Sample Quantity (mg):
Sample Prep Volume (mL):
Aliquot Volume (mL):
Diluted to Volume (mL):
Torch Z Position (mm):	0
Report Concentration Unit:	ppb
Analyte Intensities
Analyte	Concentration	Intensity
H
He
Li	0	0
Be	0.002	19
B	0	0
C	6349.15	12576957
N	43123.7	580485
O
F		6098302
Ne		0
Na	0	0
Mg	0	0
Al	0	0
Si	7.04	310257
P	0	0
S	7274.99	46076333
Cl	111.427	53006
Ar	1.25514e+09	1395445051
K	23.764	467021
Ca	0	0
Sc	0	0
Ti	0	0
V	0	0
Cr	0	0
Mn	0	0
Fe	1.757	61022
Co	0.002	67
Ni	0.014	432
Cu	0	0
Zn	0	0
Ga	0	0
Ge	0.001	19
As	0.015	46
Se	0	0
Br	0.088	175
Kr	0	0
Rb	0	0
Sr	0	0
Y	0	0
Zr	0.001	26
Nb	0	0
Mo	0.003	116
Ru	0	0
Rh	0	2
Pd	0	0
Ag	0.003	148
Cd	0.001	42
In	0.001	98
Sn	0	0
Sb	0.002	82
Te	0	0
I	0.051	314
Xe	1.476	2215
Cs	0	0
Ba	0	0
La	0	0
Ce	0	0
Pr	0	0
Nd	0	0
Sm	0	0
Eu	0	0
Gd	0	0
Tb	0	6
Dy	0	0
Ho	0	0
Er	0	0
Tm	0	0
Yb	0	0
Lu	0	7
Hf	0	0
Ta	0	0
W	0	0
Re	0	0
Os	0	0
Ir	0	0
Pt	0	0
Au	0.002	24
Hg	0	0
Tl	0	0
Pb	0	0
Bi	0	7
Th	0.037	2759
U	0.009	187
TotalQuant Equations
Analyte	Equation
Ca	740.74*mass 43
Ti	13.44*mass 47
Se	11.455*mass 82
Fe	47.17*mass 57
TotalQuant - Summary Report
Sample ID:	Lci219
Sample Date/Time:	Thursday, May 25, 2017 14:30:53
Sample Description:
Solution Type:	Sample
Sample File:
Method File:	C:\Users\Public\Documents\PerkinElmer Syngistix\ICPMS\Method\TotalQuant ADL.mth
Dataset File:	C:\Users\Public\Documents\PerkinElmer Syngistix\ICPMS\DataSet\17-9045 Wieringa TQ 1\Lci219.013
Response File:	C:\Users\Public\Documents\PerkinElmer Syngistix\ICPMS\System\totalquant.rsp
Initial Sample Quantity (mg):
Sample Prep Volume (mL):
Aliquot Volume (mL):
Diluted to Volume (mL):
Torch Z Position (mm):	0
Report Concentration Unit:	ppb
Analyte Intensities
Analyte	Concentration	Intensity
H
He
Li	0.007	296
Be	0.001	14
B	2.465	32885
C	34139.5	67626570
N	9.03041e+06	121557620
O
F		5151990
Ne		6917
Na	53.509	4300424
Mg	25.169	1631935
Al	4.655	361489
Si	42.591	1877015
P	31.279	218627
S	23751.6	150431413
Cl	1421.28	676099
Ar	0	0
K	298.885	5873729
Ca	452.591	8877893
Sc	0	11
Ti	0.655	29325
V	0.025	1032
Cr	1.047	46035
Mn	0.317	15647
Fe	23.711	823664
Co	0.013	492
Ni	5.561	173114
Cu	1.449	36458
Zn	20.59	302218
Ga	0.002	55
Ge	0	0
As	0.064	197
Se	0.499	2826
Br	2.357	4690
Kr	0	0
Rb	0.027	2096
Sr	0.178	14186
Y	0.006	434
Zr	0.065	2924
Nb	0	12
Mo	0.025	890
Ru	0	0
Rh	0	9
Pd	0	0
Ag	0.004	216
Cd	0.004	262
In	13.46	1273244
Sn	0.016	1533
Sb	0.013	501
Te	0	0
I	0.157	972
Xe	3.703	5556
Cs	0.006	552
Ba	2.305	222880
La	0.004	406
Ce	0.006	554
Pr	0.001	76
Nd	0.002	247
Sm	0.001	137
Eu	0	7
Gd	0	43
Tb	0	10
Dy	0.001	47
Ho	0	9
Er	0	8
Tm	0	9
Yb	0	12
Lu	0	26
Hf	0.003	148
Ta	0	0
W	0.013	544
Re	0	18
Os	0	0
Ir	0	0
Pt	0	0
Au	0.012	124
Hg	0.202	2313
Tl	0	0
Pb	0.03	1711
Bi	0.016	752
Th	0.04	2989
U	0.003	56
TotalQuant Equations
Analyte	Equation
Ca	740.74*mass 43
Ti	13.44*mass 47
Se	11.455*mass 82
Fe	47.17*mass 57
TotalQuant - Summary Report
Sample ID:	TQ check C
Sample Date/Time:	Thursday, May 25, 2017 14:34:52
Sample Description:
Solution Type:	Sample
Sample File:
Method File:	C:\Users\Public\Documents\PerkinElmer Syngistix\ICPMS\Method\TotalQuant ADL.mth
Dataset File:	C:\Users\Public\Documents\PerkinElmer Syngistix\ICPMS\DataSet\17-9045 Wieringa TQ 1\TQ check C.014
Response File:	C:\Users\Public\Documents\PerkinElmer Syngistix\ICPMS\System\totalquant.rsp
Initial Sample Quantity (mg):
Sample Prep Volume (mL):
Aliquot Volume (mL):
Diluted to Volume (mL):
Torch Z Position (mm):	0
Report Concentration Unit:	ppb
Analyte Intensities
Analyte	Concentration	Intensity
H
He
Li	0.061	2584
Be	10.22	124561
B	0	0
C	52529.7	104055491
N	583770	7858086
O
F		5826578
Ne		2136
Na	0.75	60247
Mg	1.625	105368
Al	10.712	831782
Si	45.715	2014661
P	4.975	34777
S	9200.6	58272235
Cl	163.074	77575
Ar	9.03762e+08	1004788647
K	31.225	613644
Ca	106.88	2096527
Sc	0	0
Ti	2.168	96997
V	10.443	429748
Cr	10.482	461066
Mn	10.207	504203
Fe	4.246	147485
Co	10.332	391655
Ni	102.436	3188873
Cu	10.101	254137
Zn	10.663	156507
Ga	0.002	72
Ge	0	0
As	10.26	31394
Se	9.939	56300
Br	2.768	5508
Kr	0	0
Rb	0.001	84
Sr	0.017	1343
Y	0.004	279
Zr	0.043	1957
Nb	0.002	66
Mo	10.195	357942
Ru	0.001	27
Rh	0.001	66
Pd	0	0
Ag	10.115	541069
Cd	10.241	713212
In	0.006	547
Sn	0.072	6744
Sb	10.272	398816
Te	0	0
I	1.67	10351
Xe	2.244	3368
Cs	0.007	657
Ba	10.254	991545
La	0.002	171
Ce	0.027	2576
Pr	0	14
Nd	0	19
Sm	0	25
Eu	0.001	81
Gd	0	0
Tb	0	7
Dy	0	0
Ho	0	2
Er	0	0
Tm	0	0
Yb	0	11
Lu	0.004	218
Hf	0.001	61
Ta	0	6
W	0	0
Re	0	3
Os	0	0
Ir	0	0
Pt	0	0
Au	0.001	9
Hg	0.003	38
Tl	10.204	676486
Pb	10.792	616723
Bi	0.02	922
Th	10.303	761656
U	7.143	146199
TotalQuant Equations
Analyte	Equation
Ca	740.74*mass 43
Ti	13.44*mass 47
Se	11.455*mass 82
Fe	47.17*mass 57
TotalQuant - Summary Report
Sample ID:	Blank C
Sample Date/Time:	Thursday, May 25, 2017 14:38:27
Sample Description:
Solution Type:	Sample
Sample File:
Method File:	C:\Users\Public\Documents\PerkinElmer Syngistix\ICPMS\Method\TotalQuant ADL.mth
Dataset File:	C:\Users\Public\Documents\PerkinElmer Syngistix\ICPMS\DataSet\17-9045 Wieringa TQ 1\Blank C.015
Response File:	C:\Users\Public\Documents\PerkinElmer Syngistix\ICPMS\System\totalquant.rsp
Initial Sample Quantity (mg):
Sample Prep Volume (mL):
Aliquot Volume (mL):
Diluted to Volume (mL):
Torch Z Position (mm):	0
Report Concentration Unit:	ppb
Analyte Intensities
Analyte	Concentration	Intensity
H
He
Li	0	0
Be	0.003	39
B	0	0
C	5282.04	10463135
N	0	0
O
F		7567464
Ne		0
Na	0	0
Mg	0	0
Al	0	0
Si	6.902	304168
P	0.349	2442
S	7254.2	45944683
Cl	84.024	39971
Ar	1.32637e+09	1474639343
K	23.344	458751
Ca	0	0
Sc	0	0
Ti	0	0
V	0	0
Cr	0.15	6602
Mn	0	0
Fe	2.144	74487
Co	0.002	82
Ni	0.051	1589
Cu	0	0
Zn	0.029	429
Ga	0	0
Ge	0	0
As	0.022	69
Se	0	0
Br	0.166	330
Kr	0	0
Rb	0	0
Sr	0	0
Y	0	6
Zr	0	20
Nb	0	4
Mo	0	0
Ru	0	0
Rh	0	0
Pd	0	0
Ag	0.004	232
Cd	0.003	187
In	0.001	112
Sn	0	0
Sb	0.003	102
Te	0	0
I	0.065	404
Xe	2.003	3006
Cs	0.001	74
Ba	0	0
La	0	0
Ce	0	0
Pr	0	6
Nd	0	0
Sm	0	0
Eu	0	0
Gd	0	0
Tb	0	11
Dy	0	0
Ho	0	4
Er	0	0
Tm	0	0
Yb	0	0
Lu	0	7
Hf	0	0
Ta	0	0
W	0	0
Re	0	0
Os	0	0
Ir	0	0
Pt	0	0
Au	0	0
Hg	0	0
Tl	0	0
Pb	0	0
Bi	0	22
Th	0.045	3346
U	0.016	322
TotalQuant Equations
Analyte	Equation
Ca	740.74*mass 43
Ti	13.44*mass 47
Se	11.455*mass 82
Fe	47.17*mass 57
TotalQuant - Summary Report
Sample ID:	Lci218
Sample Date/Time:	Thursday, May 25, 2017 14:42:18
Sample Description:
Solution Type:	Sample
Sample File:
Method File:	C:\Users\Public\Documents\PerkinElmer Syngistix\ICPMS\Method\TotalQuant ADL.mth
Dataset File:	C:\Users\Public\Documents\PerkinElmer Syngistix\ICPMS\DataSet\17-9045 Wieringa TQ 1\Lci218.016
Response File:	C:\Users\Public\Documents\PerkinElmer Syngistix\ICPMS\System\totalquant.rsp
Initial Sample Quantity (mg):
Sample Prep Volume (mL):
Aliquot Volume (mL):
Diluted to Volume (mL):
Torch Z Position (mm):	0
Report Concentration Unit:	ppb
Analyte Intensities
Analyte	Concentration	Intensity
H
He
Li	0.003	130
Be	0.001	16
B	1.281	17089
C	36040.4	71391966
N	8.77155e+06	118073034
O
F		4615353
Ne		9657
Na	70.307	5650496
Mg	41.14	2667452
Al	6.503	504973
Si	50.56	2228211
P	46.2	322924
S	30053.1	190342310
Cl	862.151	410124
Ar	0	0
K	388.227	7629491
Ca	682.873	13395037
Sc	0	0
Ti	0.384	17183
V	0.006	231
Cr	1.056	46435
Mn	0.442	21839
Fe	26.632	925125
Co	0.028	1061
Ni	20.995	653583
Cu	2.266	57022
Zn	13.465	197645
Ga	0.002	72
Ge	0.001	14
As	0.036	111
Se	0.371	2101
Br	1.585	3153
Kr	0	0
Rb	0.081	6229
Sr	0.217	17292
Y	0.007	476
Zr	0.015	668
Nb	0	6
Mo	0.105	3690
Ru	0	0
Rh	0	7
Pd	0	0
Ag	0.003	142
Cd	0.002	131
In	13.25	1253387
Sn	0.012	1142
Sb	0.006	242
Te	0	0
I	0.056	349
Xe	3.472	5210
Cs	0.008	704
Ba	0.169	16361
La	0.007	649
Ce	0.01	959
Pr	0.001	147
Nd	0.007	754
Sm	0.001	134
Eu	0	29
Gd	0.002	208
Tb	0.001	62
Dy	0.001	46
Ho	0	26
Er	0	30
Tm	0	19
Yb	0	24
Lu	0.001	74
Hf	0.001	46
Ta	0	2
W	0.011	479
Re	0.001	48
Os	0	0
Ir	0	0
Pt	0	0
Au	0.007	70
Hg	0.371	4262
Tl	0	0
Pb	0.031	1769
Bi	0.011	512
Th	0.044	3259
U	0.008	155
TotalQuant Equations
Analyte	Equation
Ca	740.74*mass 43
Ti	13.44*mass 47
Se	11.455*mass 82
Fe	47.17*mass 57
TotalQuant - Summary Report
Sample ID:	Lbo533
Sample Date/Time:	Thursday, May 25, 2017 14:46:02
Sample Description:
Solution Type:	Sample
Sample File:
Method File:	C:\Users\Public\Documents\PerkinElmer Syngistix\ICPMS\Method\TotalQuant ADL.mth
Dataset File:	C:\Users\Public\Documents\PerkinElmer Syngistix\ICPMS\DataSet\17-9045 Wieringa TQ 1\Lbo533.017
Response File:	C:\Users\Public\Documents\PerkinElmer Syngistix\ICPMS\System\totalquant.rsp
Initial Sample Quantity (mg):
Sample Prep Volume (mL):
Aliquot Volume (mL):
Diluted to Volume (mL):
Torch Z Position (mm):	0
Report Concentration Unit:	ppb
Analyte Intensities
Analyte	Concentration	Intensity
H
He
Li	0.019	782
Be	0.001	17
B	2.001	26693
C	33328.7	66020396
N	9.17759e+06	123538781
O
F		3575922
Ne		0
Na	133.193	10704596
Mg	27.252	1766981
Al	9.834	763614
Si	52.289	2304390
P	77.14	539183
S	26703.2	169125261
Cl	869.33	413539
Ar	0	0
K	1572.28	30898693
Ca	495.301	9715674
Sc	0	0
Ti	0.627	28071
V	0.012	510
Cr	0.924	40647
Mn	0.539	26644
Fe	50.167	1742657
Co	0.038	1426
Ni	24.064	749114
Cu	1.785	44903
Zn	10.01	146928
Ga	0.005	160
Ge	0.001	25
As	0.07	216
Se	0.428	2425
Br	0.741	1475
Kr	0	0
Rb	0.23	17649
Sr	0.187	14946
Y	0.08	5758
Zr	0.027	1218
Nb	0.001	24
Mo	0.089	3134
Ru	0	0
Rh	0	7
Pd	0	0
Ag	0.004	239
Cd	0.004	283
In	13.524	1279333
Sn	0.016	1534
Sb	0.003	114
Te	0	0
I	0	0
Xe	1.852	2779
Cs	0.012	1079
Ba	0.256	24726
La	0.015	1393
Ce	0.023	2159
Pr	0.002	237
Nd	0.008	823
Sm	0.002	193
Eu	0	45
Gd	0.002	137
Tb	0.001	82
Dy	0.003	199
Ho	0.001	37
Er	0.001	44
Tm	0	9
Yb	0.001	35
Lu	0.001	42
Hf	0.001	43
Ta	0	0
W	0.011	467
Re	0	0
Os	0	0
Ir	0	0
Pt	0	0
Au	0.003	34
Hg	0.204	2345
Tl	0	0
Pb	0.03	1741
Bi	0.006	261
Th	0.014	1014
U	0.006	127
TotalQuant Equations
Analyte	Equation
Ca	740.74*mass 43
Ti	13.44*mass 47
Se	11.455*mass 82
Fe	47.17*mass 57
TotalQuant - Summary Report
Sample ID:	Lbo538
Sample Date/Time:	Thursday, May 25, 2017 14:49:25
Sample Description:
Solution Type:	Sample
Sample File:
Method File:	C:\Users\Public\Documents\PerkinElmer Syngistix\ICPMS\Method\TotalQuant ADL.mth
Dataset File:	C:\Users\Public\Documents\PerkinElmer Syngistix\ICPMS\DataSet\17-9045 Wieringa TQ 1\Lbo538.018
Response File:	C:\Users\Public\Documents\PerkinElmer Syngistix\ICPMS\System\totalquant.rsp
Initial Sample Quantity (mg):
Sample Prep Volume (mL):
Aliquot Volume (mL):
Diluted to Volume (mL):
Torch Z Position (mm):	0
Report Concentration Unit:	ppb
Analyte Intensities
Analyte	Concentration	Intensity
H
He
Li	0.003	121
Be	0.002	31
B	1.103	14712
C	29849.8	59129104
N	8.32363e+06	112043622
O
F		1919718
Ne		0
Na	26.094	2097176
Mg	14.807	960023
Al	7.336	569668
Si	41.75	1839948
P	23.44	163838
S	21193	134226553
Cl	1134.25	539562
Ar	0	0
K	134.327	2639817
Ca	221.022	4335503
Sc	0	0
Ti	0.301	13486
V	0.009	365
Cr	0.925	40673
Mn	0.247	12203
Fe	29.519	1025419
Co	0.009	342
Ni	4.542	141408
Cu	1.046	26305
Zn	7.048	103457
Ga	0.002	76
Ge	0	1
As	0.046	141
Se	0.367	2082
Br	0.734	1461
Kr	0	0
Rb	0.015	1185
Sr	0.104	8291
Y	0.005	336
Zr	0.011	490
Nb	0	16
Mo	0.026	930
Ru	0	0
Rh	0	0
Pd	0	0
Ag	0.001	35
Cd	0	0
In	13.45	1272299
Sn	0.007	650
Sb	0.002	97
Te	0	0
I	0	0
Xe	2.835	4255
Cs	0.007	606
Ba	0.078	7517
La	0.007	618
Ce	0.011	1048
Pr	0.001	156
Nd	0.006	603
Sm	0.001	56
Eu	0	42
Gd	0.001	128
Tb	0	34
Dy	0.001	89
Ho	0	29
Er	0.001	56
Tm	0	6
Yb	0	0
Lu	0	11
Hf	0	13
Ta	0	0
W	0.012	486
Re	0	3
Os	0	0
Ir	0	0
Pt	0	0
Au	0.008	79
Hg	0.115	1324
Tl	0	0
Pb	0.005	273
Bi	0.003	146
Th	0.007	554
U	0.006	126
TotalQuant Equations
Analyte	Equation
Ca	740.74*mass 43
Ti	13.44*mass 47
Se	11.455*mass 82
Fe	47.17*mass 57
TotalQuant - Summary Report
Sample ID:	Lno177
Sample Date/Time:	Thursday, May 25, 2017 14:53:13
Sample Description:
Solution Type:	Sample
Sample File:
Method File:	C:\Users\Public\Documents\PerkinElmer Syngistix\ICPMS\Method\TotalQuant ADL.mth
Dataset File:	C:\Users\Public\Documents\PerkinElmer Syngistix\ICPMS\DataSet\17-9045 Wieringa TQ 1\Lno177.019
Response File:	C:\Users\Public\Documents\PerkinElmer Syngistix\ICPMS\System\totalquant.rsp
Initial Sample Quantity (mg):
Sample Prep Volume (mL):
Aliquot Volume (mL):
Diluted to Volume (mL):
Torch Z Position (mm):	0
Report Concentration Unit:	ppb
Analyte Intensities
Analyte	Concentration	Intensity
H
He
Li	0.059	2483
Be	0.002	19
B	2.102	28037
C	31778.5	62949690
N	9.88772e+06	133097819
O
F		4147122
Ne		0
Na	110.584	8887484
Mg	32.068	2079200
Al	21.784	1691574
Si	61.513	2710892
P	26.205	183163
S	19433.9	123084994
Cl	1346.08	640326
Ar	0	0
K	484.807	9527493
Ca	435.836	8549224
Sc	0.007	426
Ti	0.748	33492
V	0.046	1877
Cr	1.093	48090
Mn	0.502	24806
Fe	60.666	2107367
Co	0.09	3429
Ni	12.769	397507
Cu	1.248	31411
Zn	18.915	277633
Ga	0.007	257
Ge	0	7
As	0.064	197
Se	0.597	3380
Br	1.197	2382
Kr	0	0
Rb	0.107	8185
Sr	0.222	17728
Y	0.483	34855
Zr	0.087	3919
Nb	0.001	46
Mo	0.029	1016
Ru	0	0
Rh	0	4
Pd	0.001	46
Ag	0.003	155
Cd	0.002	135
In	13.124	1241493
Sn	0.088	8228
Sb	0.011	429
Te	0	0
I	0.058	357
Xe	4.607	6912
Cs	0.006	531
Ba	0.263	25434
La	0.03	2752
Ce	0.064	6092
Pr	0.006	607
Nd	0.024	2524
Sm	0.003	338
Eu	0.001	102
Gd	0.006	541
Tb	0.001	92
Dy	0.005	348
Ho	0.001	76
Er	0.002	131
Tm	0	14
Yb	0.002	93
Lu	0.003	166
Hf	0.004	203
Ta	0	0
W	0.013	561
Re	0	14
Os	0	0
Ir	0	0
[truncated: 226 more rows]
