# Supplementary material for: Using trace elements to identify the geographic origin of migratory bats
Source: PeerJ. 2020 Oct 19;8:e10082. doi: 10.7717/peerj.10082 (PMC7580586; doi:10.7717/peerj.10082)
Supplement: Supplemental Information 6 [file peerj-08-10082-s006.xlsx]

## Sheet: Sheet1
USNM_ID	Long	Lat	Al ppb	Ni ppb	Cu ppb	Cu ppb	Rb ppb	Y ppb	Mo ppb	Mo ppb	Sn ppb	Sn ppb	Ba ppb	Ba ppb	Ba ppb	Cs ppb	Ce ppb	Ce ppb	Hg ppb	Hg ppb	Mg ppb	Mg ppb	Al ppb	Mn ppb	Fe ppb	Fe ppb
100683	-80.305	40.695	16.0076	3.40556	3.03723	5.14215	0.491862	0.290537	1.26283	1.87997	5.81573	6.56089	3.58385	1.96421	0.165777	0.247218	0.301976	2.3329	4.61137	5.63758	12.22	48.0764	19.5144	1.28325	15.9368	30.1058
111071	-75.688	42.967	14.4166	1.82063	1.81911	3.3282	0.435753	0.2678	1.09023	1.68519	7.58359	8.55524	3.51663	2.09834	0.459192	0.220414	0.290472	2.15534	23.0555	24.1218	17.7619	48.3853	19.011	0.834835	50.4839	59.5931
122185	-77.177	38.97	17.2169	-0.102104	2.50263	4.31704	0.303953	0.189442	0.7312	1.06589	3.22994	3.65407	1.90442	0.988989	-0.269727	0.742976	0.222924	1.62007	3.16396	3.68493	11.7968	31.7829	19.0491	0.698168	16.542	25.6857
133144	-96.179	36.099	26.3242	2.12199	3.14608	4.71046	0.577836	0.330226	1.36637	2.032	7.25258	8.09586	4.5189	2.60059	0.595303	0.315802	0.350218	2.57677	3.82155	4.81142	14.5863	53.7936	29.8982	1.00891	26.9472	43.7644
202189	-87.357	33.458	9.89085	0.13674	1.06864	2.51775	0.318483	0.198394	0.787629	1.20413	1.89572	2.34469	2.28961	1.31774	0.0040023	0.496542	0.22585	1.70181	1.89213	2.48467	8.00753	29.9304	12.901	0.603607	8.94801	19.1101
208139	-86.58	32.184	15.8547	-0.335116	4.33709	5.43143	0.138935	0.100009	0.474911	0.61556	9.39196	9.70881	2.86236	2.359	1.68961	0.447084	0.14261	1.04093	1.50038	1.85272	6.85012	10.3325	14.696	0.531486	82.1171	80.6485
208140	-87.3919	30.6018	13.9407	1.93348	2.18269	4.23352	0.454182	0.270319	1.18487	1.78486	4.28526	4.84642	3.42999	2.05193	0.207652	0.542123	0.288894	2.14693	3.01234	3.55944	12.2265	43.9508	17.7294	0.840846	28.0986	40.3058
247332	-84.77	34.766	10.7738	-0.467639	2.21973	2.91244	0.0560794	0.0536181	0.154399	0.198236	0.865371	0.910637	1.28761	0.951277	0.506763	0.371885	0.0978762	0.734862	0.73907	0.695964	5.08922	4.6073	11.5824	0.2891	12.5403	17.1097
248960	-87.217	30.421	25.9025	2.29242	4.29508	5.72741	0.380427	0.233475	0.985958	1.45335	1.40736	1.92752	2.74533	1.45539	0.0352262	0.198504	0.25219	1.91726	2.23293	2.85627	11.9434	39.3254	28.9725	0.760983	20.6782	31.8093
250000	-98.8907	36.5849	19.1778	1.80493	3.68028	5.06391	0.328908	0.210262	0.843263	1.21104	1.7427	2.19345	3.15747	2.08121	0.717563	0.173291	0.236606	1.75402	2.36476	2.99126	15.4726	37.0559	20.9856	1.69191	22.8967	31.1913
254346	-84.435	33.707	14.3474	1.69635	3.55749	5.1273	0.51803	0.316627	1.29523	2.01614	2.28083	2.88154	3.55524	1.86817	-0.116207	0.294681	0.322559	2.45922	5.42532	6.14605	10.6672	45.4753	18.5465	0.983127	11.8531	27.427
258995	-77.118	38.896	23.6201	-1.35298	2.33685	3.33899	0.046565	0.0514944	0.175688	0.176817	1.21915	1.25141	1.0518	0.7666	0.318139	26.5432	0.0955839	0.696804	1.82494	1.96973	6.66175	8.06372	21.4393	0.949209	153.206	146.742
273724	-98.677	34.708	15.131	0.319955	2.88821	4.317	0.361871	0.225261	0.928832	1.37007	2.80199	3.43647	2.79294	1.64523	0.268667	0.518268	0.243325	1.82386	3.7738	4.42706	10.8986	34.9418	18.5784	0.781736	12.5432	22.2995
276577	-84.2279	30.905	9.7586	0.539012	1.89041	3.49562	0.415809	0.25184	1.06154	1.58053	1.00372	1.39697	2.77108	1.33906	-0.255916	0.575004	0.269481	2.03437	2.60384	3.11373	11.7349	39.4453	11.501	0.972814	7.96642	20.1908
276648	-77.036	38.907	26.771	0.513115	1.464	2.90622	0.291628	0.202289	0.810485	1.1442	1.40003	1.68303	2.08818	1.18538	-0.0582135	0.369509	0.224941	1.65369	1.51202	2.09087	8.76409	30.7021	29.4402	0.964404	85.6945	94.9477
293375	-80.414	37.23	13.9217	-0.0260167	1.92292	3.07927	0.289768	0.190835	0.756475	1.1241	2.39276	2.8038	2.51322	1.47871	0.218934	0.507259	0.220142	1.62941	1.87202	2.48399	21.7096	43.4704	16.6312	0.861235	13.856	23.544
293376	-80.266	36.641	19.7755	1.35549	4.59994	6.5952	0.503502	0.309457	1.31618	1.96546	2.23748	2.67572	5.08198	3.74406	1.73202	0.279774	0.319652	2.36012	4.19092	4.69217	24.3361	62.1714	24.1221	1.66824	26.1268	36.5401
347545	-89.995	31.87	15.8995	1.40145	2.13813	4.00444	0.409477	0.250634	1.02473	1.53732	1.56404	2.07314	2.99524	1.59445	-0.0171008	0.223918	0.273986	2.06504	3.28475	3.93758	12.0139	41.3864	19.9184	1.17061	11.4442	23.8176
347546	-89.995	31.87	8.61263	0.700519	2.09818	3.72108	0.352928	0.213693	0.850454	1.2573	0.706899	1.04507	2.3051	1.13478	-0.223913	0.227484	0.243973	1.7625	2.56917	3.04478	11.4628	34.8613	11.0445	1.26353	14.0877	24.5061
347654	-78.968	38.745	14.9352	1.25452	1.88539	2.85973	0.150669	0.105276	0.444961	0.564921	4.52768	4.71971	1.68586	1.05531	0.305837	0.193777	0.139712	1.04488	1.36231	1.76949	8.39243	15.681	14.4676	0.490757	15.1539	20.3869
347661	-78.968	38.745	11.6889	4.36401	3.94222	5.55772	0.396543	0.239883	0.973191	1.5039	0.838699	1.18105	2.88615	1.70733	0.145485	1.62664	0.252852	1.96924	2.90758	3.56178	13.6648	35.8858	13.7894	1.58157	14.6608	25.3826
348357	-91.507	31.1	40.809	7.82169	1.62341	3.18253	0.508898	0.287758	1.20636	1.81237	0.986486	1.47572	3.28452	1.58989	-0.225617	0.587317	0.304825	2.30374	2.57837	3.36503	11.33	45.7684	48.6494	1.07817	9.91104	25.2798
348364	-91.507	31.1	10.7512	0.748443	1.8152	3.38533	0.3636	0.226999	0.94128	1.4005	0.893549	1.31314	2.66323	1.45798	0.0135016	2.20533	0.24051	1.86448	2.18965	2.91507	11.8141	36.3702	12.6455	1.25367	132.248	142.154
363726	-86.61	41.16	12.9229	0.130806	0.882668	2.18371	0.302613	0.190728	0.764111	1.07031	0.859241	1.11757	2.27629	1.20877	-0.0526339	0.517037	0.216075	1.66352	1.85294	2.33409	9.38592	31.6115	13.5643	0.589544	4.36776	14.7985
363734	-86.1397	39.7744	14.0703	1.48191	1.13583	1.99146	0.139769	0.0982552	0.433644	0.532441	0.860711	1.0535	0.848502	0.291907	-0.437924	0.122377	0.143103	1.03694	1.09551	1.33725	9.19805	14.8973	12.2148	0.620338	14.2358	18.3789
363838	-87.125	39.524	9.27077	-1.49326	-0.488404	-0.236829	-0.0104527	0.0301858	0.060447	0.00474185	0.37213	0.321849	-0.0182712	-0.213184	-0.549363	0.368696	0.0686504	0.518515	0.246954	0.214917	3.92466	-1.14537	8.41596	0.172845	3.82258	6.0018
363839	-87.084	40.104	10.1393	0.468733	0.478938	1.04794	0.0974569	0.0876829	0.308089	0.409115	0.771683	0.840275	0.657614	0.154144	-0.50844	0.39306	0.122462	0.885595	0.692405	0.87376	8.25983	12.7036	10.1891	0.334625	4.83682	10.0479
363843	-86.924	41.181	12.1428	0.387578	0.91419	2.14681	0.238495	0.154734	0.624043	0.928036	0.949366	1.14469	1.48571	0.676347	-0.427501	0.135108	0.179916	1.4225	1.25414	1.7478	9.30346	27.0405	13.4374	0.448991	5.76437	13.8971
554360	-94.787	40.289	38.7521	2.42259	10.0416	12.5594	0.499615	0.290223	1.51991	2.09886	1.26438	1.66546	9.20651	7.90202	6.35047	0.760747	0.352207	2.31983	2.83697	3.58847	23.0173	58.2555	42.843	3.95806	54.7538	62.9796
600226	-76.5026	38.495	10.5133	-1.73415	0.337808	0.618739	-0.0177538	0.0183153	0.0167799	-0.0539707	0.333278	0.265125	-0.161571	-0.324093	-0.592961	0.326297	0.0695735	0.495924	0.104922	0.0164425	7.91644	1.9661	8.41626	0.0907536	6.75547	6.69465
111070	-75.688	42.967	7.37849	-0.516275	-1.06416	1.33324	0.254879	0.135922	0.570993	0.920213	15.6317	15.8218	3.43598	2.4167	1.44457	0.149394	0.0887152	0.637085	1.72126	1.99577	10.8039	21.0679	8.13746	0.912692	13.8182	21.7668
114790	-91.05	40.9	15.7629	2.2576	3.3093	7.07422	0.779253	0.456819	1.84055	2.8522	5.81576	6.72816	7.18552	4.97148	2.28213	0.422256	0.364975	2.89118	5.03023	5.80558	17.3088	58.9708	20.1526	1.31803	15.6769	42.4542
114791	-91.05	40.9	12.7765	1.70699	3.15002	6.96226	0.707898	0.408802	1.71	2.64513	8.99376	9.92028	5.90172	3.55908	1.05556	0.369304	0.32485	2.55697	4.60965	5.09734	14.6457	51.3839	16.4647	1.11392	17.9558	42.5565
114792	-91.05	40.9	14.7919	0.872297	2.03843	5.50722	0.600068	0.334721	1.35768	2.10045	5.33565	5.97752	4.99307	3.27306	1.11411	0.318748	0.262595	2.06821	3.42682	4.03861	16.2375	62.3616	18.8603	0.994848	16.3959	41.2519
117375	-94.345	32.757	16.8936	6.09992	5.66124	11.3446	1.28562	0.737246	3.05018	4.74655	22.7112	24.414	10.391	6.82476	2.54046	0.625232	0.640108	4.90691	5.91353	7.28856	23.582	92.4356	21.6491	2.18283	50.2571	87.1377
117376	-94.345	32.757	14.2335	5.18306	5.21068	10.3167	1.24571	0.724644	2.93387	4.6072	15.4746	16.7371	8.87227	5.16924	0.942474	0.614044	0.616223	4.81788	5.30837	6.72126	20.7693	89.8839	19.5213	2.09552	34.8611	76.3052
117411	-99.22	29.893	30.5737	4.92364	4.84049	10.4139	1.25223	0.708955	2.87254	4.46971	5.74939	7.13583	10.015	6.54588	2.45161	0.590072	0.59578	4.61113	5.4067	6.69606	25.6019	91.5366	31.9027	0.836118	44.5926	57.6118
117412	-99.24	30.077	23.1645	14.9923	5.39206	11.1082	1.26107	0.720917	2.95631	4.66139	12.306	13.6265	9.79976	6.08856	1.90005	0.64206	0.616017	4.82062	5.32143	6.73238	24.0381	92.748	29.7266	2.17152	150.591	178.803
117413	-99.24	30.077	16.6263	0.960956	2.77068	6.30526	0.546439	0.304188	1.36015	2.02645	7.08169	7.50511	5.46376	3.90392	2.067	0.281456	0.232879	1.7792	3.11687	3.57108	24.2041	95.5292	25.5525	2.06695	24.6096	67.9813
127860	-76.4948	38.9744	25.4077	5.42002	5.36452	10.7157	1.21386	0.70536	2.84632	4.49459	42.6245	44.0474	9.20324	5.51088	1.37221	0.603899	0.586341	4.57921	6.58114	7.68216	23.4928	89.4285	31.0198	1.77015	47.1423	83.3851
133140	-96.179	36.099	23.1426	2.9353	4.31677	8.59987	0.820679	0.473752	1.90105	3.05422	10.1912	10.9677	6.23112	3.7995	0.964793	0.41687	0.39861	3.03292	4.27207	5.12498	16.7131	55.8764	25.9755	1.53738	26.837	53.0674
133141	-96.179	36.099	25.2859	2.7483	3.00086	6.65527	0.76173	0.433684	1.76689	2.74584	8.20228	9.07405	5.79844	3.51589	0.889988	0.383381	0.352226	2.76759	3.75283	4.54087	17.2024	57.8138	29.0024	1.22868	29.6471	53.6474
133142	-96.179	36.099	16.6598	7.21459	4.59473	10.2977	1.285	0.745122	3.00206	4.8033	6.18171	7.50168	9.51132	5.77061	1.34673	0.640654	0.628635	4.95638	7.91207	9.42885	22.0677	92.4928	24.2381	2.29836	18.9478	62.5951
140763	-75.688	42.967	11.5308	3.02356	3.538	8.09895	0.914816	0.535245	2.19581	3.47092	6.38905	7.52425	6.66195	3.95567	0.70368	0.492973	0.430594	3.40971	6.32034	6.99513	19.2399	69.3046	15.7756	1.33821	23.1677	53.4027
140764	-75.688	42.967	50.029	5.03912	11.4111	16.2225	1.09803	0.613346	2.43607	3.78871	14.3699	15.8369	18.7317	16.4867	13.3691	0.528043	0.559483	3.93334	38.2176	38.3998	25.7976	76.9494	51.724	2.18779	135.122	153.864
147250	-88.644	42.633	18.6215	4.30331	5.54555	10.1077	0.974876	0.55863	2.35965	3.58729	7.24914	8.73565	8.03242	5.12032	1.79834	0.52841	0.502025	3.66372	10.5131	10.8858	26.6865	82.268	23.1961	1.53577	63.5012	87.4225
157077	-84.1228	36.2078	39.5615	3.96554	5.26859	10.2287	0.973336	0.55106	2.24071	3.50349	5.09972	6.07897	8.4323	5.58867	2.39271	0.484153	0.476974	3.62245	4.62924	5.67358	20.0283	69.312	41.598	1.73783	62.7686	88.0004
159049	-84.185	36.178	12.0463	2.01795	7.02919	11.4064	0.830304	0.480141	2.06799	3.16677	4.36458	5.1729	6.59514	4.02056	1.1226	0.459551	0.385773	3.10197	5.18071	6.24999	21.8617	63.4553	17.111	1.29572	20.3773	50.1091
160616	-77.177	38.97	46.8111	2.22477	5.5256	9.7017	0.825806	0.472189	1.89468	2.92373	7.05338	8.20487	7.90861	5.53927	2.92492	0.420579	0.427333	3.09717	3.5966	4.67152	23.1664	64.6279	48.9761	2.17351	60.6863	82.2794
169711	-96.8	32.78	10.162	3.29253	3.08785	7.4902	0.828766	0.47672	1.98322	3.06834	6.8098	7.9087	5.95101	3.46966	0.522158	0.421859	0.381979	3.03557	3.19272	4.22457	14.9744	60.7532	14.3227	1.35295	29.1541	58.0752
171491	-85.25	33.02	9.38894	2.7145	2.2679	6.34202	0.785118	0.451201	1.92902	2.9361	2.78215	3.6488	6.00408	3.63772	0.781767	0.405159	0.360827	2.89138	3.87787	4.82895	15.4375	58.5675	13.6984	1.39605	6.98209	35.2063
171424	-86.312	31.57	12.9787	2.07733	3.11595	7.14275	0.78614	0.446905	1.88586	2.85101	2.29376	3.1666	6.45833	4.10649	1.42523	0.538432	0.36065	2.83197	5.86861	7.05628	15.7192	56.5369	16.5214	1.43426	17.0078	43.1484
175508	-77.036	38.907	14.3487	2.13313	5.89333	9.95879	0.767105	0.426749	1.77384	2.73828	3.49077	4.31438	6.12064	3.80394	1.11449	0.488305	0.344977	2.72435	5.9404	6.44384	17.9887	59.162	17.5014	1.23461	21.2731	47.2228
176511	-85.25	31.572	11.665	2.36671	2.61225	6.44529	0.804569	0.458414	1.88013	2.96167	2.8267	3.69083	6.13954	3.6364	0.803852	0.512204	0.378304	2.93054	7.43163	8.05623	14.6469	56.0248	16.25	1.32016	14.0759	42.0025
180156	-90.24	31.373	13.9499	3.2238	7.86384	11.5976	0.711694	0.410931	1.79188	2.63307	10.4998	11.3508	5.7513	3.68746	1.264	0.377927	0.323887	2.56549	3.81255	4.59777	16.4155	55.7462	18.0865	1.15244	41.645	65.5912
201597	-86.0886	34.0218	53.2178	3.6801	6.43257	11.0577	0.898425	0.522899	2.19908	7.05838	3.1279	4.01909	9.70045	6.81069	3.7098	0.5357	0.422047	3.3355	5.15026	5.92581	17.9451	64.7725	51.1575	1.56313	54.42	77.638
201598	-86.089	34.022	15.5137	2.20156	4.53469	8.64889	0.779932	0.438185	1.89438	2.91659	3.23162	4.1807	6.95659	4.55536	1.89054	0.426556	0.362484	2.86367	3.75804	4.38979	16.716	57.7515	19.2954	1.99709	25.9761	51.7483
201709	-86.295	34.358	15.4655	2.43315	4.8282	9.02029	0.882819	0.506044	2.13997	3.31559	3.27586	4.22842	7.10794	4.43658	1.36439	0.47054	0.425356	3.27288	4.04551	5.01357	17.3217	64.5874	19.3713	1.92519	18.1728	48.7152
201710	-87.006	34.138	11.7045	2.25818	2.55021	6.88037	0.802606	0.454851	1.90827	2.89642	2.82601	3.85007	6.13351	3.62074	0.900087	0.478251	0.364808	2.89371	3.05853	4.04971	14.4461	58.077	15.955	1.17343	14.9059	44.0961
203166	-88.043	30.694	20.8875	2.60794	2.23864	6.49302	0.848336	0.490003	2.02885	3.15833	2.56071	3.43193	6.23804	3.73821	0.683982	0.455399	0.386167	3.20182	3.42531	4.32626	17.4476	62.5863	23.5551	1.25894	8.8936	37.7763
204979	-77.177	38.97	19.6406	2.72706	3.18707	7.22949	0.805814	0.465898	1.9157	3.01412	9.35721	10.3842	8.19867	5.82579	2.99168	0.488541	0.377468	3.00111	3.72173	4.52299	21.9605	62.8674	22.8806	1.88989	134.666	150.5
208138	-86.58	32.184	14.3649	3.30275	2.82938	7.0332	0.788689	0.45329	1.93755	2.9864	3.18538	4.09775	5.99142	3.59727	0.728451	0.429483	0.359763	2.89446	3.17141	4.04214	14.7653	56.1608	18.405	1.02257	14.2403	40.4077
212748	-82.6259	34.9112	56.4355	0.532121	3.12147	5.67618	0.449456	0.237341	1.00974	1.49335	3.58234	3.93583	6.82424	5.75468	3.97932	0.369399	0.249555	1.41528	5.8646	6.03716	15.2473	34.9152	53.0967	1.16862	141.419	141.948
212749	-82.6259	34.9112	16.2456	2.6404	4.55005	9.08833	0.901532	0.511209	2.13263	3.28245	7.92897	8.84367	7.38493	4.86479	1.70675	0.614274	0.429791	3.33363	9.9397	10.3562	15.0706	63.9603	19.4507	2.26171	138.243	154.387
212750	-81.253	35.246	15.9988	2.05495	2.30861	6.60936	0.846402	0.490602	1.99409	3.10244	5.12263	6.16811	6.94829	4.45714	1.46622	0.558561	0.395712	3.06777	4.41257	5.22698	16.6798	59.5907	19.6228	1.46239	17.9477	44.7911
216644	-77.036	38.907	25.7304	1.84784	1.78126	5.91289	0.797076	0.455248	1.87572	2.9141	2.63245	3.46995	7.52919	5.1391	2.47032	0.610362	0.380711	2.87428	3.45129	4.33144	15.5211	57.8732	29.1386	1.9358	57.71	81.2827
234026	-96.764	46.876	12.5254	1.80232	2.40108	6.73075	0.786265	0.455266	1.92418	2.94546	3.10362	3.86748	6.10902	3.62576	0.795233	0.724163	0.367946	2.97765	3.29887	4.29669	12.3154	56.51	15.7934	1.17073	27.8119	50.315
234848	-90.563	42.59	8.45458	-4.04577	-1.80686	-0.484997	-0.0556855	-0.0445637	-0.100016	-0.239193	2.21682	2.14227	0.974326	0.844401	0.886514	0.281715	-0.0752094	-0.615233	-0.180003	-0.211814	3.37997	-1.84097	6.50178	-0.378107	8.40497	6.28281
266473	-100.728	48.582	19.4623	-1.28247	2.55248	5.5638	0.33907	0.194318	0.920421	1.33579	2.05564	2.51756	3.18436	2.00824	0.760693	3.34603	0.128731	1.03938	1.35221	1.74734	9.60695	24.6298	19.3577	0.639012	27.4714	40.4283
268953	-82.058	29.217	10.9265	3.54409	2.21989	6.94586	1.02579	0.597632	2.42589	3.75572	5.40427	6.73959	7.35416	4.38479	0.811422	0.784951	0.483633	3.90495	4.25825	5.43561	17.7521	72.739	16.4274	1.61761	15.2872	50.8193
269984	-89.4401	36.3681	9.77932	-0.0646049	1.59336	4.74282	0.463427	0.237795	1.05831	1.63499	4.67668	5.26081	4.45183	3.14259	1.74582	0.863551	0.168222	1.38837	2.76094	3.27117	58.7539	76.0275	10.9823	2.97003	25.8089	38.0512
276576	-84.2279	30.905	17.0663	2.60306	3.1627	7.56531	0.889879	0.506878	2.11897	3.23856	3.59393	4.58889	6.21638	3.72584	0.628582	0.861367	0.416904	3.23644	3.52651	4.45758	14.249	62.1804	21.7453	1.34353	15.5986	46.8395
276579	-84.2279	30.905	11.7947	3.90233	1.92719	6.61457	1.03165	0.586382	2.4159	3.7931	2.27522	3.42188	7.17354	4.30997	0.696305	0.837576	0.480273	3.77868	4.1922	5.2861	15.1396	70.527	16.9108	1.63352	11.3868	45.9078
282670	-75.328	41.087	11.6133	5.48262	4.0057	7.93773	0.705135	0.397462	1.6872	2.58808	1.74742	2.65745	5.6179	3.71813	1.1731	0.407246	0.312646	2.49436	2.69404	3.4954	17.9307	53.5968	15.3042	1.98786	109.563	124.73
282671	-77.11	40.291	13.5957	7.08356	5.60063	11.1595	1.27309	0.739023	3.04822	4.72589	4.88895	6.31995	10.7562	7.24502	3.02378	0.644507	0.617119	4.87718	5.06418	6.51741	23.7255	93.4996	18.7683	2.38219	98.6925	130.744
288991	-96.6447	34.1925	19.1794	4.8585	2.49933	7.75851	1.07687	0.637022	2.64974	4.04949	2.35384	3.53538	8.19658	4.94864	1.31109	0.605722	0.537551	4.18808	4.14687	5.2905	22.6254	80.8267	23.6848	1.65501	32.1221	65.1302
293374	-80.6771	37.3133	21.9848	5.81814	4.92391	10.8989	1.32562	0.730338	3.05673	4.7136	6.03789	7.27656	14.193	10.745	6.93682	0.646882	0.62064	4.86407	5.03298	6.49149	31.6721	99.8644	28.5597	2.3199	176.219	199.326
297189	-95.23	38.971	11.6857	7.43285	2.27897	7.8496	1.23101	0.718403	2.90314	4.57296	2.52031	3.83532	8.6875	5.0542	0.729368	0.644824	0.593651	4.7497	8.53785	9.68364	17.3208	85.1206	17.5549	1.8023	7.01731	50.4909
297190	-95.23	38.971	24.3654	-0.110326	2.46247	5.56662	0.440139	0.247851	1.07344	2.8078	2.28899	2.63675	3.94328	2.45769	0.926771	5.49401	0.179714	1.4648	16.1754	15.5945	12.3425	35.1746	24.9161	0.667772	55.493	64.6889
297853	-78.358	38.608	76.0864	-0.707129	6.10298	8.71242	0.260654	0.138472	0.864232	1.11504	3.22128	4.1731	4.32208	3.23984	2.43759	1.53319	0.0841375	0.700132	1.22243	1.51094	9.89002	22.3373	81.5461	1.65156	683.584	686.594
314874	-77.018	38.898	11.7352	-0.735003	-0.344008	1.52893	0.162998	0.0967252	0.446322	0.601518	0.459632	0.585156	1.78461	1.10549	0.312862	0.102729	0.0474098	0.346381	0.628383	0.79128	5.70989	12.7134	12.0382	0.109259	10.0801	16.3138
314875	-77.018	38.898	17.4041	3.52301	3.31346	7.75975	0.851332	0.492048	2.10187	3.23204	2.4337	3.36887	6.54154	4.15371	1.08168	0.982664	0.408298	3.18005	3.2937	4.22726	15.5245	59.9229	21.5946	0.614588	21.7432	34.857
347547	-89.995	31.87	13.6617	4.65913	2.52778	8.259	1.19147	0.688512	2.83992	4.525	2.62628	3.9197	8.5526	5.06827	0.974153	0.6147	0.565787	4.53918	4.66097	5.90179	18.2818	83.3354	19.3954	1.85985	15.2892	56.5633
347653	-78.968	38.745	17.8798	2.48627	3.51312	6.74601	0.470384	0.277201	1.18762	2.0762	1.00763	1.45763	3.88206	2.32475	0.601034	0.481005	0.214825	1.67357	2.14713	2.58917	15.2416	59.2326	22.5633	1.70846	20.6925	47.1134
347660	-78.968	38.745	9.78524	-0.313892	0.362212	3.02026	0.27803	0.147716	0.727236	1.03898	1.23421	1.5702	2.54736	1.56906	0.476967	0.438305	0.0936944	0.764178	1.24964	1.55632	6.71889	21.3818	10.0414	0.244832	10.81	21.0569
347662	-78.968	38.745	11.2179	3.2919	2.22687	6.73324	0.870583	0.500869	2.00762	3.18386	2.63326	3.60318	6.29889	3.73086	0.636691	0.698459	0.397327	3.2188	4.32648	5.17255	13.8221	59.7536	14.7429	1.30825	15.3305	42.265
347663	-78.968	38.745	23.2511	4.81241	4.14546	8.56574	0.857522	0.497156	2.06364	3.23637	1.7757	2.70541	7.07578	4.66181	1.60601	0.540786	0.400762	3.18599	3.37379	4.34947	16.5507	61.7357	27.0569	1.91098	17.4933	48.4177
348359	-91.507	31.1	9.24118	3.55074	0.998886	5.54664	0.940143	0.546369	2.30877	3.56056	1.70025	2.69604	6.78343	3.96201	0.678974	0.486355	0.434626	3.48162	3.9683	4.89187	15.7498	67.3757	13.6749	1.37391	2.2642	35.902
348360	-91.507	31.1	19.1749	4.51556	2.97735	8.50457	1.22907	0.711614	3.01551	4.66137	3.43386	4.75902	8.84338	5.26331	0.963139	0.602976	0.597136	4.73761	4.74298	6.04914	20.2881	87.1385	25.0212	2.19499	11.5526	52.1486
348361	-91.507	31.1	14.8413	6.59724	3.90097	7.82101	0.795311	0.456268	1.94403	2.95337	2.0904	3.03771	5.94436	3.6334	0.868243	0.413299	0.361669	2.90947	3.32514	4.22038	18.5666	61.0711	18.4199	1.23767	15.9982	44.5322
348362	-91.507	31.1	12.4133	-0.50989	-0.258597	2.41738	0.403399	0.225552	0.990053	1.50146	1.24981	1.63669	3.28625	2.00308	0.438531	0.209811	0.161915	1.31213	1.6619	2.1884	10.0747	30.1194	13.0164	1.00803	102.222	110.889
348363	-91.507	31.1	8.75701	-1.2562	-0.207857	2.42311	0.307467	0.166934	0.793782	1.13414	1.75896	2.12971	2.57002	1.44892	0.326934	0.226516	0.107924	0.891282	1.46616	1.86799	7.56763	22.4747	9.60424	1.12903	238.348	239.976
348365	-91.507	31.1	9.61336	-0.768467	0.500368	3.30832	0.373296	0.203571	1.08092	1.50401	0.767417	1.1197	3.24091	1.8854	0.523037	0.573546	0.141035	1.11251	2.53832	2.91822	8.91084	25.5859	10.3071	2.11727	423.802	421.814
348366	-91.507	31.1	10.1899	3.8211	2.1915	7.29586	1.10625	0.650505	2.67116	4.18116	2.74035	3.8971	8.1914	4.94615	1.01367	3.84164	0.52944	4.24336	4.27287	5.62557	16.6779	80.2814	15.2554	1.90018	27.1558	65.5837
349271	-88.818	33.45	16.5424	-1.42008	1.17525	3.42893	0.209094	0.113989	0.615641	0.803623	5.98047	6.13197	1.93936	1.23625	0.38751	0.193558	0.0818555	0.481589	0.866537	1.09691	8.57611	17.3978	16.7048	0.179739	27.7221	32.3862
363714	-87.51	41.55	13.3951	2.27422	2.07076	6.24502	0.875588	0.507833	2.09242	3.24464	2.36219	3.44252	6.69446	4.05599	0.985306	6.47585	0.423036	3.28555	3.66613	4.73003	16.5519	63.1778	17.0908	1.5106	16.4345	46.8518
363716	-85.445	40.45	132.958	2.02163	1.95009	6.44145	0.900423	0.52588	2.1685	3.37676	2.51984	3.85543	6.96263	4.26853	1.07522	0.597463	0.43241	3.3943	4.15589	5.21528	19.654	67.6072	126.224	2.49135	16.6797	48.8622
363717	-85.445	40.45	16.0725	2.61319	2.59698	6.95462	0.920894	0.534552	2.22937	3.42603	2.13156	3.2074	6.6899	3.87488	0.720828	0.641164	0.433824	3.49274	3.91881	4.80957	16.8322	63.3287	20.796	1.44166	21.4016	51.9178
363719	-85.666	41.359	12.3727	3.06658	3.55043	7.83377	0.929276	0.546484	2.2367	3.46868	3.20468	4.11473	6.68857	3.97803	0.637978	0.655165	0.439719	3.56476	3.71026	4.69524	18.0897	70.8322	17.5997	1.5616	38.1974	66.4887
363727	-84.989	38.945	12.9565	5.03572	3.05576	8.31561	1.15588	0.670786	2.77312	4.32236	4.16952	5.63831	8.37823	4.94195	0.930929	0.606034	0.544319	4.44905	4.35282	5.65563	19.9469	83.9431	19.0313	2.02773	11.6083	53.0867
363732	-84.987	38.905	25.3042	4.58682	1.43881	6.28989	0.963854	0.557408	2.29851	3.56622	2.14799	3.31234	6.8603	4.18702	0.803264	0.80196	0.450143	3.60039	3.53437	4.60998	16.3584	68.4381	29.9653	1.84514	10.2895	44.8762
363836	-86.875	40.417	9.30954	1.57808	1.22879	5.08943	0.773225	0.455705	1.90128	2.91227	1.48051	2.3369	5.88636	3.32289	0.555496	0.520336	0.357525	2.86495	2.89704	3.70521	13.2108	58.3231	13.7511	1.10422	2.33015	32.6402
363846	-87.219	38.252	7.75321	-0.113531	-0.0312997	3.05168	0.44861	0.251853	1.11811	1.69192	0.940318	1.35336	3.39217	1.91087	0.2074	0.230429	0.182645	1.46098	1.86248	2.31722	8.96654	31.8707	8.48882	0.85059	16.9531	31.8424
363848	-86.264	40.422	9.75361	8.69233	6.39546	10.6546	0.794852	0.444288	1.84833	2.8597	1.83279	2.71828	5.75022	3.38414	0.719899	0.938438	0.358898	2.84253	3.044	3.97178	16.3417	57.8035	13.502	1.26604	8.894	37.3093
363849	-86.742	39.249	11.205	-1.16721	1.44973	4.30414	0.314898	0.176271	0.943414	1.33905	2.13039	2.47851	2.79374	1.71893	0.536724	0.214369	0.115068	0.921638	1.20658	1.54916	11.2105	25.9125	11.8861	0.387104	20.7312	31.0974
551794	-86.072	46.278	14.2588	-1.48666	0.789684	3.43481	0.277858	0.154589	0.734867	1.05319	0.953981	1.19365	2.60103	1.56345	0.553537	0.222968	0.135999	0.838043	1.47174	1.66661	9.69772	23.5295	14.8007	0.514245	56.3769	63.5598
551795	-86.072	46.278	9.93967	-0.289909	0.440131	3.10111	0.323986	0.182034	0.848624	1.2052	2.64498	2.90332	2.56831	1.40266	0.196923	0.365479	0.160943	1.03113	1.49417	1.87713	9.22525	25.3905	10.956	0.319434	11.9689	23.1373
560460	-76.638	38.291	11.1278	-0.887877	0.946447	3.49055	0.354201	0.183506	0.949184	1.33475	0.689421	1.06641	3.08345	1.96224	0.785047	0.585715	0.122026	0.972468	1.30575	1.68261	11.7375	25.6337	11.5428	0.421212	8.5075	19.6999
567585	-76.8721	38.7849	11.6594	2.74166	2.28612	6.81049	0.91382	0.53373	2.17272	3.38183	1.81298	2.80755	7.09629	4.26354	1.01866	0.598373	0.426082	3.37285	3.48132	4.53477	18.8099	68.5831	15.2362	0.631376	6.49142	25.6954
568880	-77.184	38.97	12.7	3.37723	1.56098	5.73868	0.839305	0.488163	2.01705	3.18308	2.39809	3.26914	6.27929	3.70289	0.611289	0.788937	0.389064	3.11703	3.23811	4.19506	13.3535	61.1977	17.0567	1.45824	68.0754	89.6164
269985	-89.4318	36.3627	41.0793	-1.4719	1.08865	3.372	0.283031	0.140664	0.703301	1.03037	1.13239	1.50314	2.8217	1.95763	0.863308	1.48087	0.0919302	0.709326	1.09337	1.37364	38.5451	49.3926	40.3859	0.6232	31.7206	38.5301
160035	-86.1031	37.1855	13.8082	1.57978	1.89708	3.42598	0.322178	0.206432	0.879726	1.21299	8.40914	9.18639	2.59685	1.58215	0.232938	0.232447	0.225183	1.70887	2.08849	2.74746	8.86985	30.3959	17.1045	0.679416	13.2983	24.2143
505297	-77.036	38.907	12.8512	3.20005	1.72694	6.19041	0.892899	0.527774	2.15424	3.37223	1.98354	3.03245	6.59219	3.86554	0.643563	3.33337	0.421503	3.40247	3.95036	4.97545	14.2655	63.5633	17.3293	1.5414	5.15136	35.5063
169454	-82.6	38.405	12.6979	2.28574	3.29428	7.19196	0.794753	0.453582	1.90287	2.9619	3.68715	4.593	95.7797	92.6781	91.7252	0.420825	0.357833	2.90237	3.15232	4.01736	16.5983	60.6618	16.3248	1.12424	26.3349	50.1551
133143	-96.179	36.099	27.0834	5.46605	6.32166	11.7659	1.27732	0.732343	2.89456	4.53791	5.52807	6.8283	9.11434	5.58698	1.32803	0.6156	0.684229	4.9081	5.59725	6.99357	22.9757	91.1857	31.8843	2.13662	58.3674	99.4475
276578	-84.2279	30.905	13.1296	4.29476	1.19156	6.38669	1.0818	0.629817	2.55703	4.05812	2.18992	3.4392	7.68072	4.48451	0.590724	0.561191	0.522253	4.13718	4.15022	5.32669	14.8917	73.5409	17.8659	1.56161	3.10725	43.0475
567584	-76.8721	38.7849	11.9773	3.87916	3.87284	5.8425	0.511858	0.303173	1.24281	1.89624	1.31111	1.87162	5.09959	3.37743	1.43241	0.529226	0.313522	2.36522	2.9597	3.83769	14.726	49.8955	15.9472	1.08634	7.99808	23.1659
212747	-82.603	34.92	46.7623	-0.507514	1.45474	3.77933	0.269873	0.14789	0.658307	0.969962	2.36075	2.62322	9.11962	8.4105	7.49178	0.497301	0.133958	0.719477	5.96207	6.12131	10.4021	22.3752	44.8658	1.23113	127.66	132.327
570886	-97.041	32.897	12.7152	0.44211	1.20823	2.51234	0.35737	0.233649	0.956797	1.41296	0.780444	1.1495	2.49413	1.20852	-0.252991	0.557697	0.248726	1.86397	1.74061	2.41763	8.21905	33.1303	14.2258	1.42714	79.5967	85.9253
223145	-77.142	38.969	17.7302	0.247554	4.41399	6.2037	0.355112	0.21831	0.949637	1.34963	4.31835	4.94949	4.60721	3.59321	2.34748	3.19914	0.252796	1.81166	2.79442	3.36441	15.7293	38.9794	20.8293	0.882658	26.227	35.5592
297191	-95.23	38.971	16.2387	0.754795	6.51279	7.71847	0.357326	0.218227	0.916189	1.3392	1.45542	1.78833	3.1285	2.05183	0.61443	0.966401	0.268615	1.82042	61.4222	62.7391	10.8087	34.0769	17.4829	0.823931	49.4016	57.7
117410	-99.1089	29.8938	21.4156	6.18925	4.02968	9.31914	1.23984	0.71197	2.89047	4.58529	7.3503	8.80239	8.77523	5.16811	0.86269	0.611138	0.586478	4.71054	5.62448	6.85423	21.0437	88.5008	25.0917	2.05386	10.8485	53.2709
254344	-84.435	33.707	25.9356	0.612678	3.92475	5.03798	0.261817	0.163062	0.616487	0.949458	3.29265	3.64335	105.294	104.221	104.476	0.148859	0.195368	1.36593	1.48037	2.00094	9.16672	22.1225	29.0447	0.906704	30.6083	38.3467
254343	-73.956	41.392	16.1266	-0.186441	2.65438	3.54287	0.147748	0.0987644	0.3577	0.491738	9.09779	9.66882	4.75711	4.62841	3.81139	0.0837619	0.143937	1.0216	1.87523	1.97097	9.87209	15.0069	15.3613	0.367245	28.9968	31.9815
234025	-96.764	46.876	10.6857	2.22207	1.25623	5.48253	0.838501	0.488473	2.0458	3.16992	2.16283	3.13714	6.99115	4.47662	1.47722	0.80246	0.390836	3.15479	3.55085	4.44269	12.8562	59.1486	14.5602	1.14375	9.41159	40.429
234847	-90.563	42.59	15.5375	3.67137	3.2801	8.28506	1.09523	0.625042	2.53405	3.98765	3.91634	5.22141	8.00335	4.93051	1.18422	0.855863	0.522522	4.13602	4.48212	5.71959	17.1435	75.8425	20.5456	1.73527	20.6295	55.9872
